# Supplementary material for: Henipaviruses and lyssaviruses target nucleolar treacle protein and regulate ribosomal RNA synthesis
Source: PubMed Central journal article supplement — Traffic. 2022 Dec 30;24(3):146–57. doi: 10.1111/tra.12877 (PMC10947316; doi:10.1111/tra.12877), 2022-12-30
Supplement: TRA-24-146-s001.pdf [file TRA-24-146-s001.pdf]

# Figure S1

|      |                                                                             |     |
|------|-----------------------------------------------------------------------------|-----|
| MOJV | -----MEATSDFKDATWQDGGLLKSIDAELEQGYMPIKYRVIN                                 | 39  |
| KV   | -----MEAITNFMFYTWFEFGSLNKVEPELDENGSMIPKVRVLN                                | 39  |
| CEDV | MDPSDLRRIIMEDDKSLVNNDDSTETDFLEKTWREGSKIDKITPEVDENGNMVKYVVFN                 | 60  |
| HEV  | MDF-----SVSDNLDDPIEGVSDFSPTSWENGGYLDKVEPEIDKHGSMIPKYKIYT                    | 51  |
| NIV  | MEP-----DIKSISSEMEGVSDFSFSSWENGGYLDKVEPEIDENGSMIPKYKIYT                     | 51  |
|      | . ::* :*. * . :. : * :*: * * :* * : .                                       |     |
| MOJV | PGGNERKTMGYMYLIAYGFVEDVLNDHKTQQKPKIRTVAAYPFVGVSSDSSPEDLLKSAC                | 99  |
| KV   | PGYNDKSSGYQYLICYGFVEDIRSESNKDKKPTIRTTASFPLGVGRSDASPENLLDEVC                 | 99  |
| CEDV | PGKNERKTSGYQYMICYGFIEDGPIGSPRVKGNIRTTASFPLGVGKTYSSPEEILQELT                 | 120 |
| HEV  | PGANERKFNNMYMICYGFVEDVERSPESGRKKKIRTTAAYPLGVGKSTSHPQDLLEELC                 | 111 |
| NIV  | PGANERKYNMYMICYGFVEDVERTPETGKRKKKIRTTAAYPLGVGKSASHPQDLLEELC                 | 111 |
|      | ** * :* * . * * :* :* * :* * . : . * * * * :* :* * * : : * :* :* . .        |     |
| MOJV | ALDVSVRTAGATEKIVMGARTLGLCLAPWSSVLNNGAIFNASKICNNVDLIQLGTPQRL                 | 159 |
| KV   | KLSITVRRTAGAEEKIVYGVSGGILYLDPWKKVLKNGAIFTATKVCNIECVLVDKHQSL                 | 159 |
| CEDV | TLKITVRRTAGSNEKLVYGITGPLNHLYPWKVLTGGSIFSAVKVCRNVDQILLDRPQIL                 | 180 |
| HEV  | SLKVTVRRTAGATEKIVFGSSGPLHLLPWKKILTGGSI FNAVKVCRNVDQIQLEKQQL                 | 171 |
| NIV  | SLKVTVRRTAGSTEKVVFGSSGPLNHLVPWKVLTGGSIFNAVKVCRNVDQIQLDKHQAL                 | 171 |
|      | * : :* * * :* :* * * : * * * . :* :* * :* * * * :* :* : : : * *             |     |
| MOJV | RIFFLSITLLTDKGIYKPKTVLEFRESNAVAFNLLVSLRIDTDLTRAGMKGIVDKEGRR                 | 219 |
| KV   | RIFFLSITKLTDRGYTIPRRMLEFRYNNAIANLLVTLAISTDTTKSGVRGKKNEDGFT                  | 219 |
| CEDV | RVFFLSITKLTDRGVYMI PKSVLDFRSDNSMAFNLLVYLKIDTDTKAGIRGIVNKEGER                | 240 |
| HEV  | RIFFLSITKLNDSGIYMI PRMTLEFRNNAIAFNLLVYLKIDADLAKAGIQGSFDKDGTK                | 231 |
| NIV  | RIFFLSITKLNDSGIYMI PRMTLEFRNNAIAFNLLVYLKIDADLSKMGIQGSLDKDGFK                | 231 |
|      | * : * * * * * * * * * * : * :* * * * :* :* * * * * * * * : * :* * :* :*     |     |
| MOJV | LATFMLHIGNFVRRGRKPYSEYCKKKVENMALIFSLGAVGGLSLHVRFTGKLSKRLIAS                 | 279 |
| KV   | LVTFMTHMGNFQRRAGKTYSEYCSRRKVDKMKMKSFLGAIIGLSFHVRIDGVI SKRLFAE               | 279 |
| CEDV | ITSFMLHIGNFTRRGKHYSEYCKRKIDMKMLTFALGTIGGLSLHIRIDGRISKRLQAQ                  | 300 |
| HEV  | VASFMLHLGNFVRRAGKYSEYCKRKIDRMKQLQSLGSIIGGLSLHIKINGVISKRLFAQ                 | 291 |
| NIV  | VASFMLHLGNFVRRAGKYSDVYCKRKIDRMKQLQSLGSIIGGLSLHIKINGVISKRLFAQ                | 291 |
|      | : . :* * * :* * * * * * * * * :* :* * * * :* :* * * * * * * * :* :* * * * * |     |
| MOJV | MRFHRNICFSLMDINPGLNKLWNHECEIQKITAVFQPSIPKDFKIYDDVLDINTGKILK                 | 339 |
| KV   | MGFRRNICYCLIDINPWINKLWNTCEIRNVAAVLQPSVPRDFMIYDDVFDINTGKILP                  | 339 |
| CEDV | VGFQRNICYSLMDTNPWLNKLWNNSCEIHKVTAVIQPSVPKDFMLEDILIDINTGKILK                 | 360 |
| HEV  | MGFQKNLCFSLMDINPWLNRLWNNSCEISRVAAVLQPSVPREFMIYDDVFDINTGKILK                 | 351 |
| NIV  | MGFQKNLCFSLMDINPWLNRLWNNSCEISRVAAVLQPSVPREFMIYDDVFDINTGRILK                 | 351 |
|      | : * :* :* :* :* * * * * :* :* * * * * * * * * * * * * * * * * * * * * *     |     |
| MOJV | N---                                                                        | 340 |
| KV   | SKHA                                                                        | 343 |
| CEDV | ----                                                                        | 360 |
| HEV  | G---                                                                        | 352 |
| NIV  | G---                                                                        | 352 |

## Supplementary Figure S1 Sequence alignment of henipavirus M proteins used in study.

Alignment using Clustal Omega (version 1.2.4) of HeV M (Accession number: AEB21196.1), NiV M (AAV43914.1), CedV M (AFP87277.1), MojV M (AHM23775.1) and KV M (YP\_009091836). Positions with an absolutely conserved residue (\*); residues with strong similarity (:); Residues with weak similarity (.). Key residues of the bipartite NLS (two clusters of basic residues) are highlighted in red font; K258 residue (bold underlined) is absolutely conserved across all species.

## Figure S2

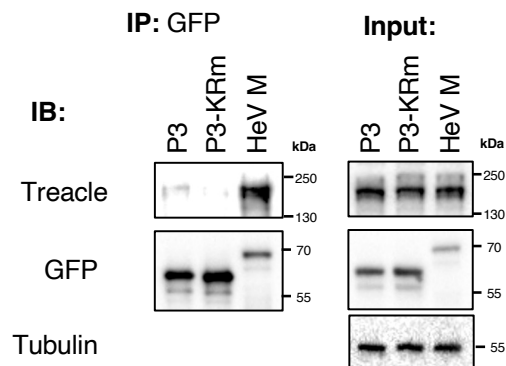

**Supplementary Figure S2** **HeV M co-precipitates Treacle to a greater extent than P3.** HEK-293T cells were transfected to express the indicated GFP-fused proteins, prior to lysis and IP with GFP-Trap beads (as performed in Figs. 3A & 5A). IP and input samples were analysed by IB and probed with the indicated antibodies.

# Figure S3

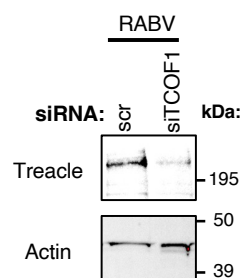

**Supplementary Figure S3** Confirmation of the effectiveness of siRNA knockdown. HEK-293 cells were transfected with siRNA (scr or siTCOF1) for 48 h (see Materials and Methods for details) prior to infection by RABV (MOI 0.01). Cells were lysed at 48 h p.i. and analysed by IB using the indicated antibodies.

# Figure S4

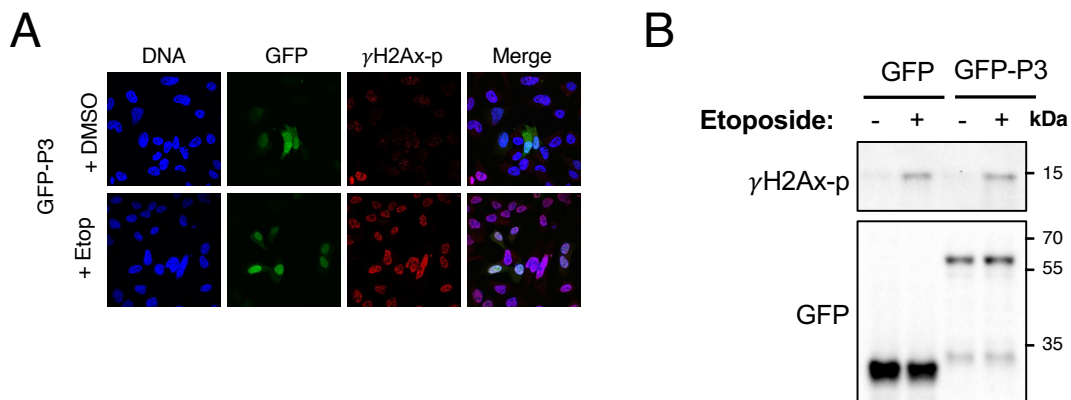

**Supplementary Figure S4**      **Expression of RABV P3 does not induce DNA-damage in HeLa cells.**

HeLa cells transfected to express GFP-P3 protein were treated without (DMSO) or with etoposide at 21 h p.t. for 3 h prior to (A) fixation and immunostaining for  $\gamma$ H2AX phosphorylated at S139 ( $\gamma$ H2AX-p), and imaging by CLSM (images representative of 10 fields of view taken from two independent experiments) or (B) lysed and analysed for IB analysis using the indicated antibodies.
